# Supplementary material
Source: PubMed Central journal article supplement (PMC7940387)
Supplement: 41431_2020_760_MOESM3_ESM.pdf [file 41431_2020_760_MOESM3_ESM.pdf]

**Table S2. Information on deceased individuals**

| ID         | Sex | Birth year | Year of death | Age at death | Cause of death (ICD-10 Code) <sup>1</sup>                                                                             | rsID       | Gene  |
|------------|-----|------------|---------------|--------------|-----------------------------------------------------------------------------------------------------------------------|------------|-------|
| Deceased 1 | F   | 1966       | 2015          | 49           | C50.9 Malignant neoplasm of breast of unspecified site                                                                | novel      | BRCA1 |
| Deceased 2 | M   | 1928       | 2009          | 81           | C34.9 Malignant neoplasm of unspecified part of bronchus or lung<br>I25.9 Chronic ischemic heart disease, unspecified | rs80357906 | BRCA1 |
| Deceased 3 | M   | 1941       | 2014          | 73           | C22.1 Intrahepatic bile duct carcinoma                                                                                | rs80357906 | BRCA1 |
| Deceased 4 | M   | 1971       | 2015          | 43           | C15.9 Malignant neoplasm of esophagus, unspecified                                                                    | rs80359112 | BRCA2 |

<sup>1</sup>As noted on death certificates, data from the Estonian Causes of Death Registry.
