# Supplementary material
Source: PubMed Central journal article supplement (PMC7940387)
Supplement: 41431_2020_760_MOESM4_ESM.pdf [file 41431_2020_760_MOESM4_ESM.pdf]

**Table S3. Characteristics of cascade screening participants**

| ID <sup>1</sup> | Relation to index  | Age | Sex | Children | Ca.dx. and age at dx. | Fam.hx. of ca. | LP or KP |
|-----------------|--------------------|-----|-----|----------|-----------------------|----------------|----------|
| 1.2             | brother            | 29  | M   | 0        | no                    | high           | yes      |
| 1.1             | pat.aunt           | 64  | F   | 3        | cervical ca., 40y     | high           | no       |
| 1.3             | sister             | 36  | F   | 0        | no                    | high           | no       |
| 2.1             | mother             | 76  | F   | 1        | BC, 49y               | moderate       | yes      |
| 2.2             | son                | 19  | M   | 0        | no                    | moderate       | yes      |
| 4.2             | daughter           | 29  | F   | 0        | no                    | moderate       | yes      |
| 4.1             | half-sister        | 43  | F   | 0        | no                    | moderate       | no       |
| 5.2             | sister             | 38  | F   | 3        | no                    | high           | yes      |
| 5.1             | mat.uncle          | 60  | M   | 3        | no                    | high           | no       |
| 5.3             | daughter           | 21  | F   | 0        | no                    | high           | no       |
| 5.4             | brother            | 28  | M   | 0        | no                    | high           | no       |
| 7.3             | son                | 32  | M   | 0        | no                    | low            | yes      |
| 7.4             | son                | 34  | M   | 1        | no                    | low            | yes      |
| 7.1             | nephew (brother's) | 31  | M   | 0        | no                    | low            | no       |
| 7.2             | brother            | 63  | M   | 2        | no                    | low            | no       |
| 7.5             | niece (brother's)  | 38  | F   | 2        | Melanoma, 30y         | low            | no       |
| 9.1             | niece (brother's)  | 45  | F   | 3        | no                    | moderate       | no       |
| 9.2             | nephew (brother's) | 54  | M   | 0        | no                    | moderate       | no       |
| 9.3             | nephew (brother's) | 50  | M   | 3        | no                    | moderate       | no       |
| 10.1            | mother             | 58  | F   | 3        | BC, 39y               | high           | yes      |
| 12.1            | daughter           | 21  | F   | 0        | no                    | high           | Yes      |
| 17.2            | daughter           | 34  | F   | 2        | no                    | moderate       | yes      |
| 17.1            | son                | 33  | M   | 2        | no                    | moderate       | no       |
| 17.3            | son                | 30  | M   | 0        | no                    | moderate       | no       |
| 17.4            | half-sister        | 56  | F   | 0        | no                    | moderate       | no       |
| 20.1            | brother            | 44  | M   | 2        | no                    | low            | no       |

BC, breast cancer; LP, likely pathogenic; KP, known pathogenic.

<sup>1</sup>The first digit is the ID number of the index individual and the second digit is the number of the relative who underwent cascade screening.
