# Supplementary material
Source: PubMed Central journal article supplement (PMC7940387)
Supplement: 41431_2020_760_MOESM5_ESM.pdf [file 41431_2020_760_MOESM5_ESM.pdf]

**Table S4. Individual responses to surveys administered immediately and 6 months after disclosure of genetic risk information**

|                                                                       | Participant ID                                                                                  | 1 | 2 | 3 | 4 | 5 | 6 | 7 | 8 | 9 | 10 | 11 | 12 | 13 | 14 | 15 | 16 | 17 | 18 | 20 | 21 | 22 | Mean |     |
|-----------------------------------------------------------------------|-------------------------------------------------------------------------------------------------|---|---|---|---|---|---|---|---|---|----|----|----|----|----|----|----|----|----|----|----|----|------|-----|
| Immediate response                                                    | <b>Emotional Response<sup>1</sup></b>                                                           |   |   |   |   |   |   |   |   |   |    |    |    |    |    |    |    |    |    |    |    |    |      |     |
|                                                                       | I feel calm                                                                                     | 4 | 4 | 2 | 3 | 4 | 4 | 3 | 3 | 1 | 3  | 4  | 4  | 4  | 4  | 4  | 3  | 3  | 3  | 4  | 3  | 3  | 3.3  |     |
|                                                                       | I am tense                                                                                      | 2 | 3 | 2 | 1 | 1 | 1 | 2 | 3 | 4 | 2  | /  | 1  | 1  | 1  | 3  | 2  | 1  | 2  | 1  | 1  | 2  | 1.8  |     |
|                                                                       | I feel upset                                                                                    | 2 | 1 | 2 | 1 | 2 | 2 | 2 | 2 | 4 | 2  | /  | 1  | 2  | 1  | 2  | 2  | 2  | 2  | 1  | 1  | 2  | 1.8  |     |
|                                                                       | I am relaxed                                                                                    | 4 | 1 | 4 | 4 | 4 | 3 | 4 | 4 | 2 | 3  | 4  | 4  | 3  | 4  | 3  | 3  | 4  | 4  | 4  | 3  | 4  | 3.5  |     |
|                                                                       | I feel content                                                                                  | 2 | 4 | 4 | 3 | 4 | 4 | 1 | 3 | 2 | 4  | 4  | 4  | 3  | 4  | 3  | 3  | 3  | 4  | 3  | 4  | 3  | 3.3  |     |
|                                                                       | I am worried                                                                                    | 3 | 2 | 2 | 2 | 2 | 2 | 2 | 2 | 4 | 2  | /  | 2  | 2  | 1  | 2  | 2  | 2  | 3  | 2  | 2  | 2  | 2.2  |     |
|                                                                       | <b>Perceived impact<sup>2</sup></b>                                                             |   |   |   |   |   |   |   |   |   |    |    |    |    |    |    |    |    |    |    |    |    |      |     |
|                                                                       | Information provided was understandable                                                         | 4 | 5 | 4 | 5 | 5 | 5 | 5 | / | 5 | 5  | 5  | 5  | 5  | 5  | 5  | 5  | 5  | 5  | 5  | 5  | 5  | 5    | 4.9 |
|                                                                       | Information provided was interesting                                                            | 5 | 5 | 4 | 5 | 4 | 5 | 4 | 5 | 5 | 5  | 5  | 5  | 4  | 3  | 5  | 5  | 5  | 5  | 5  | 5  | 4  | 5    | 4.7 |
|                                                                       | Information provided was informative                                                            | 5 | 5 | 4 | 5 | 5 | 5 | 4 | 5 | 5 | 5  | 5  | 5  | 5  | 5  | 5  | 5  | 5  | 5  | 5  | 5  | 5  | 5    | 4.9 |
|                                                                       | Information provided was valuable                                                               | 5 | 5 | 4 | 5 | 5 | 5 | 5 | 4 | 5 | 5  | 5  | 5  | 5  | 5  | 5  | 5  | 5  | 5  | 5  | 5  | 5  | 5    | 4.9 |
|                                                                       | I understand the potential impact of the finding on my close relatives                          | 5 | 5 | 4 | 5 | 5 | 5 | 5 | 4 | 5 | 5  | 5  | 5  | 5  | 5  | 5  | 5  | 5  | 5  | 4  | 5  | 5  | 5    | 4.9 |
|                                                                       | I can explain the potential impact of this genetic finding on health risks to my family members | 5 | 5 | 4 | 5 | 5 | 5 | 4 | 4 | 4 | 4  | 5  | 5  | 5  | 5  | 5  | 4  | 5  | 5  | 5  | 5  | 4  | 4.7  |     |
|                                                                       | I know who to turn to regarding health concerns or for counselling                              | 5 | 5 | 5 | 5 | 5 | 5 | 4 | 5 | 5 | 4  | 5  | 5  | 5  | 5  | 5  | 5  | 4  | 5  | 5  | 4  | 5  | 4.8  |     |
| <b>Decision regret<sup>2</sup></b>                                    |                                                                                                 |   |   |   |   |   |   |   |   |   |    |    |    |    |    |    |    |    |    |    |    |    |      |     |
| I am glad that the Biobank contacted me regarding the genetic finding | 5                                                                                               | 5 | 5 | 5 | 5 | 5 | 5 | 5 | 5 | 5 | 5  | 5  | 5  | 4  | 5  | 5  | 5  | 5  | 3  | 5  | 4  | 5  | 4.8  |     |

|                          |                                                             |    |   |    |   |   |    |   |   |   |   |   |   |    |   |   |    |   |   |     |
|--------------------------|-------------------------------------------------------------|----|---|----|---|---|----|---|---|---|---|---|---|----|---|---|----|---|---|-----|
| <b>6-month follow-up</b> | <b>Emotional Response<sup>1</sup></b>                       |    |   |    |   |   |    |   |   |   |   |   |   |    |   |   |    |   |   |     |
|                          | I feel calm                                                 | NA | 3 | NA | 3 | 4 | NA | 3 | 3 | 4 | 3 | 4 | 4 | NA | 4 | 4 | NA | 3 | 3 | 3.5 |
|                          | I am tense                                                  |    | 2 |    | 2 | 1 |    | 2 | 2 | 1 | 2 | 1 | 1 |    | 1 | / |    | 2 | 1 | 1.5 |
|                          | I feel upset                                                |    | 2 | NA | 2 | 2 | NA | 2 | 2 | 2 | 2 | 1 | 1 | NA | 1 | / | NA | 2 | 1 | 1.7 |
|                          | I am relaxed                                                |    | 3 |    | 3 | 4 |    | 3 | 3 | 2 | 3 | 4 | 4 |    | 4 | / |    | 3 | 4 | 3.3 |
|                          | I feel content                                              |    | 4 |    | 3 | 3 |    | 1 | 3 | 2 | 3 | 3 | 4 |    | 4 | / |    | 2 | 3 | 2.9 |
|                          | I am worried                                                |    | 2 |    | 2 | 2 |    | 2 | 3 | 2 | 2 | 1 | 1 |    | 1 | / |    | 2 | 2 | 1.8 |
|                          | <b>Coping and decision regret<sup>2</sup></b>               |    |   |    |   |   |    |   |   |   |   |   |   |    |   |   |    |   |   |     |
|                          | I am able to cope with having this condition in my family   |    | 5 |    | 5 | 5 |    | 5 | 4 | 5 | 5 | 5 | 5 |    | 5 | 5 |    | 4 | 5 | 4.8 |
|                          | It was the right decision                                   |    | 5 |    | 5 | 5 |    | 5 | 5 | 5 | 5 | 5 | 5 |    | 5 | 5 |    | 4 | 4 | 4.8 |
|                          | I regret the choice that was made                           |    | 1 |    | 1 | 1 |    | 1 | 2 | 1 | 1 | 1 | 1 |    | 1 | / |    | 2 | 2 | 1.3 |
|                          | I would go for the same choice if I had to do it over again |    | 5 |    | 5 | 5 |    | 5 | 5 | 4 | 5 | 5 | 5 |    | 5 | / |    | 5 | 4 | 4.8 |
|                          | The choice did me a lot of harm                             |    | 1 |    | 1 | 1 |    | 1 | 2 | 2 | 1 | 1 | 1 |    | 1 | / |    | 2 | 1 | 1.3 |
|                          | The decision was a wise one                                 |    | 5 |    | 4 | 5 |    | 5 | 4 | 5 | 5 | 5 | 5 |    | 5 | / |    | 4 | 4 | 4.7 |
|                          | <b>Perceived impact<sup>2</sup></b>                         |    |   |    |   |   |    |   |   |   |   |   |   |    |   |   |    |   |   |     |
|                          | I now have better access to health care / specialists       |    | 3 |    | 2 | 2 |    | 5 | 2 | 1 | 5 | 3 | 5 |    | 5 | 5 |    | 3 | 4 | 3.5 |
|                          | I feel that my treatment and/or condition has improved      |    | 4 |    | 4 | 1 |    | 2 | 3 | 3 | 4 | 3 | 3 |    | 3 | 3 |    | 1 | 3 | 2.8 |
|                          | The information received has somehow changed my life        |    | 5 |    | 5 | 5 |    | 5 | 4 | 5 | 5 | 5 | 5 |    | 5 | 5 |    | 4 | 5 | 4.8 |

<sup>1</sup>Responses given on a four-point scale: 4, very much; 3, moderately; 2, somewhat; 1, not at all; /, response left blank.

<sup>2</sup>Responses given on a five-point Likert scale: 5, agree; 4, slightly agree; 3, difficult to say; 2, slightly disagree; 1, disagree; /, response left blank.
