# Supplementary material
Source: PubMed Central journal article supplement (PMC7940387)
Supplement: 41431_2020_760_MOESM6_ESM.pdf [file 41431_2020_760_MOESM6_ESM.pdf]

**S5. Table. Breast cancer population screening vs. identification of high-risk individuals: criteria for further risk evaluation**

|                                    | National screening program                                                                                                                | High risk individuals                                                                                                                                                                                               |
|------------------------------------|-------------------------------------------------------------------------------------------------------------------------------------------|---------------------------------------------------------------------------------------------------------------------------------------------------------------------------------------------------------------------|
| <b>Target-group</b>                | Population breast screening; 50-69 year old women with health insurance and no breast cancer at age 45–50 years; invitation every 2 years | An individual at any age with a known pathogenic/likely pathogenic variant in a cancer susceptibility gene within the family                                                                                        |
| <b>Counselling</b>                 | N/A                                                                                                                                       | Counselling by medical geneticist                                                                                                                                                                                   |
| <b>Management and surveillance</b> | Breast awareness at age 20 years, breast self exam every month                                                                            | Breast awareness at age 18y, breast self exam every month                                                                                                                                                           |
|                                    | At age ≥40 clinical breast exam once a year with gynecologist examination                                                                 | Clinical breast exam, every 6-12 months<br>breast MRI (starting at 25y) and breast mammogram (starting at 30y)                                                                                                      |
|                                    | N/A                                                                                                                                       | Every 6 months gynecologic checkup, transvaginal ultrasound, serum C1-125 and H4 onco markers screening (starting at age 35y)                                                                                       |
|                                    |                                                                                                                                           | Follow-up by oncologist every 6 months                                                                                                                                                                              |
|                                    |                                                                                                                                           | Discuss option of risk-reducing mastectomy                                                                                                                                                                          |
|                                    | Discuss options for risk-reducing salpingo-oophorectomy when ≥35y                                                                         |                                                                                                                                                                                                                     |
|                                    | PSA analyse starting ≥ 50 y old men; ≥45 when at least 1 prostate cancer in the family                                                    | Prostate cancer screening for BRCA2 carriers starting at age 45y and clinical breast exam, every 12 months, starting at age 35y. Consider prostate cancer screening for BRCA1 carriers (considering family history) |
| <b>Relatives</b>                   | N/A                                                                                                                                       | Recommend genetic counselling and consideration of genetic testing for close relatives                                                                                                                              |
